# Supplementary material for: High genetic diversity among and within bitter manioc varieties cultivated in different soil types in Central Amazonia
Source: PubMed Central journal article supplement (PMC5488453; doi:10.1590/1678-4685-gmb-2016-0046), 2017-04-10
Supplement: 1415-4757-gmb-1678-4685-GMB-2016-0046-Suppl01.pdf [file 1415-4757-gmb-1678-4685-GMB-2016-0046-Suppl01.pdf]

**Table S1** - Table of private alleles (with frequencies > 0.05) found in bitter manioc varieties in different soil types in Manicoré, Amazonas, Brazil. Soil types are coded as ADE (Amazonian dark earths), FP (floodplain) and OX (Oxisols).

| Varieties/Soil types | Locus   | Allele | Frequency |
|----------------------|---------|--------|-----------|
| <i>Tartaruga</i> FP  | GA140   | 168    | 0.500     |
| <i>Tartaruga</i> FP  | SSRY89  | 118    | 0.500     |
| <i>Olho Roxo</i> FP  | GA126   | 188    | 0.500     |
| <i>Olho Roxo</i> FP  | SSRY13  | 212    | 0.483     |
| <i>Aruari</i> OX     | SSRY13  | 222    | 0.483     |
| ADE                  | SSRY164 | 154    | 0.130     |
| Floodplain           | GA126   | 188    | 0.107     |
| Floodplain           | GA140   | 168    | 0.108     |
| Floodplain           | SSRY89  | 118    | 0.107     |
| Floodplain           | SSRY13  | 212    | 0.104     |
| Floodplain           | SSRY13  | 238    | 0.196     |
| Oxisols              | GA131   | 114    | 0.173     |
| Oxisols              | SSRY13  | 222    | 0.095     |
